# Supplementary material for: Diphenyl polysulfides: cathodes with excellent lithiation performance and high specific energy for LSBs
Source: Royal Society of Chemistry journal article supplement (doi:10.1039/c9ra06402h), 2019-01-01
Supplement: c9ra06402h1.pdf [file c9ra06402h1.pdf]

Supporting Information

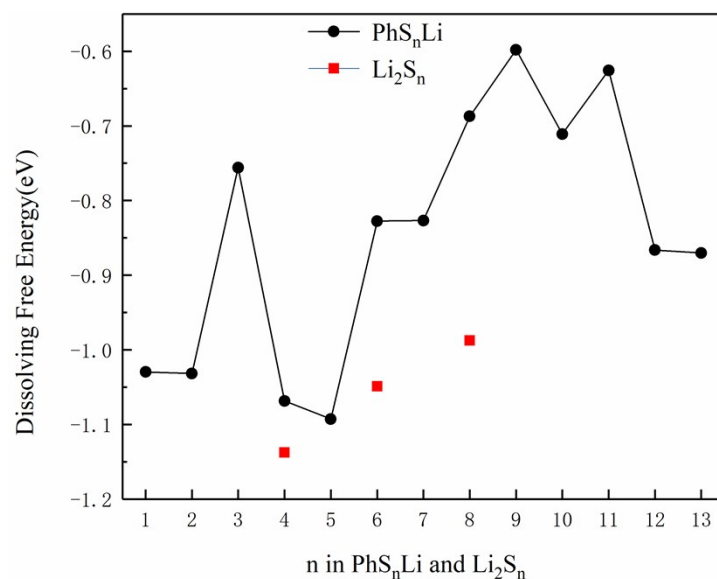

Fig S1 The dissolving free energies of  $PhS_nLi$  ( $1 \leq n \leq 13$ ) and  $Li_2S_n$  ( $n = 4, 6, 8$ )

Table S1 The discharge reactions, reaction energies and corresponding voltages of  $PhS_nPh$  ( $1 < n \leq 15$ ).

| Label          | Category     | Reactions                                        | $G_{rec}$ (eV) | Voltage(V) | Feasibility |
|----------------|--------------|--------------------------------------------------|----------------|------------|-------------|
| R <sub>1</sub> | $PhS_2Ph$    | $PhS_2Ph + 2Li \rightarrow 2PhSLi$               | - 5.07         | 2.54       | √           |
| R <sub>1</sub> | $PhS_3Ph$    | $PhS_3Ph + 2Li \rightarrow PhS_2Li + PhSLi$      | - 5.11         | 2.55       | √           |
| R <sub>3</sub> |              | $PhS_2Li + 2Li \rightarrow PhSLi + Li_2S$        | - 4.36         | 2.18       | √           |
| R <sub>1</sub> | $PhS_4Ph$    | $PhS_4Ph + 2Li \rightarrow 2PhS_2Li$             | - 5.13         | 2.57       | √           |
| R <sub>3</sub> |              | $PhS_2Li + 2Li \rightarrow PhSLi + Li_2S$        | - 4.36         | 2.18       | √           |
| R <sub>1</sub> | $PhS_5Ph$    | $PhS_5Ph + 2Li \rightarrow PhS_2Li + PhS_3Li$    | - 5.05         | 2.53       | √           |
| R <sub>2</sub> |              | $PhS_3Li + 2Li \rightarrow PhSLi + Li_2S_2$      | - 5.03         | 2.52       | √           |
| R <sub>3</sub> |              | $PhS_2Li + 2Li \rightarrow PhSLi + Li_2S$        | - 4.36         | 2.18       | √           |
| R <sub>3</sub> |              | $Li_2S_2 + 2Li \rightarrow 2Li_2S$               | - 3.80         | 1.90       | √           |
| R <sub>1</sub> | $PhS_6Ph$    | $PhS_6Ph + 2Li \rightarrow PhS_2Li + PhS_4Li$    | - 5.05         | 2.53       | √           |
| R <sub>2</sub> |              | $PhS_4Li + 2Li \rightarrow PhS_2Li + Li_2S_2$    | - 4.94         | 2.47       | √           |
| R <sub>3</sub> |              | $PhS_2Li + 2Li \rightarrow PhSLi + Li_2S$        | - 4.36         | 2.18       | √           |
| R <sub>3</sub> |              | $Li_2S_2 + 2Li \rightarrow 2Li_2S$               | - 3.80         | 1.90       | √           |
| R <sub>1</sub> | $PhS_7Ph$    | $PhS_7Ph + 2Li \rightarrow PhS_2Li + PhS_5Li$    | - 5.08         | 2.54       | √           |
| R <sub>2</sub> |              | $PhS_5Li + 2Li \rightarrow PhS_3Li + Li_2S_2$    | - 5.01         | 2.51       | √           |
| R <sub>2</sub> |              | $PhS_3Li + 2Li \rightarrow PhSLi + Li_2S_2$      | - 5.03         | 2.52       | √           |
| R <sub>3</sub> |              | $PhS_2Li + 2Li \rightarrow PhSLi + Li_2S$        | - 4.36         | 2.18       | √           |
| R <sub>3</sub> |              | $Li_2S_2 + 2Li \rightarrow 2Li_2S$               | - 3.80         | 1.90       | √           |
| R <sub>1</sub> | $PhS_8Ph$    | $PhS_8Ph + 2Li \rightarrow PhS_2Li + PhS_6Li$    | - 5.29         | 2.65       | √           |
| R <sub>2</sub> |              | $PhS_6Li + 2Li \rightarrow PhS_4Li + Li_2S_2$    | - 4.92         | 2.46       | √           |
| R <sub>2</sub> |              | $PhS_4Li + 2Li \rightarrow PhS_2Li + Li_2S_2$    | - 4.94         | 2.47       | √           |
| R <sub>3</sub> |              | $PhS_2Li + 2Li \rightarrow PhSLi + Li_2S$        | - 4.36         | 2.18       | √           |
| R <sub>3</sub> |              | $Li_2S_2 + 2Li \rightarrow 2Li_2S$               | - 3.80         | 1.90       | √           |
| R <sub>1</sub> | $PhS_9Ph$    | $PhS_9Ph + 2Li \rightarrow PhS_2Li + PhS_7Li$    | - 5.25         | 2.63       | √           |
| R <sub>2</sub> |              | $PhS_7Li + 2Li \rightarrow PhS_5Li + Li_2S_2$    | - 4.83         | 2.42       | √           |
| R <sub>2</sub> |              | $PhS_5Li + 2Li \rightarrow PhS_3Li + Li_2S_2$    | - 5.01         | 2.51       | √           |
| R <sub>2</sub> |              | $PhS_3Li + 2Li \rightarrow PhSLi + Li_2S_2$      | - 5.03         | 2.52       | √           |
| R <sub>3</sub> |              | $PhS_2Li + 2Li \rightarrow PhSLi + Li_2S$        | - 4.36         | 2.18       | √           |
| R <sub>3</sub> |              | $Li_2S_2 + 2Li \rightarrow 2Li_2S$               | - 3.80         | 1.90       | √           |
| R <sub>1</sub> | $PhS_{10}Ph$ | $PhS_{10}Ph + 2Li \rightarrow PhS_2Li + PhS_8Li$ | - 5.36         | 2.68       | √           |

|                |                                                     |                                                     |                                                     |        |      |
|----------------|-----------------------------------------------------|-----------------------------------------------------|-----------------------------------------------------|--------|------|
| R <sub>2</sub> |                                                     | $PhS_8Li + 2Li \rightarrow PhS_6Li + Li_2S_2$       | - 5.04                                              | 2.52   | √    |
| R <sub>2</sub> |                                                     | $PhS_6Li + 2Li \rightarrow PhS_4Li + Li_2S_2$       | - 4.92                                              | 2.46   | √    |
| R <sub>2</sub> |                                                     | $PhS_4Li + 2Li \rightarrow PhS_2Li + Li_2S_2$       | - 4.94                                              | 2.47   | √    |
| R <sub>3</sub> |                                                     | $PhS_2Li + 2Li \rightarrow PhSLi + Li_2S$           | - 4.36                                              | 2.18   | √    |
| R <sub>3</sub> |                                                     | $Li_2S_2 + 2Li \rightarrow 2Li_2S$                  | - 3.80                                              | 1.90   | √    |
| R <sub>1</sub> | PhS <sub>11</sub> Ph                                | $PhS_{11}Ph + 2Li \rightarrow PhS_2Li + PhS_9Li$    | - 4.88                                              | 2.44   | √    |
| R <sub>2</sub> |                                                     | $PhS_9Li + 2Li \rightarrow PhS_7Li + Li_2S_2$       | - 5.49                                              | 2.75   | √    |
| R <sub>2</sub> |                                                     | $PhS_7Li + 2Li \rightarrow PhS_5Li + Li_2S_2$       | - 4.83                                              | 2.42   | √    |
| R <sub>2</sub> |                                                     | $PhS_5Li + 2Li \rightarrow PhS_3Li + Li_2S_2$       | - 5.01                                              | 2.51   | √    |
| R <sub>2</sub> |                                                     | $PhS_3Li + 2Li \rightarrow PhSLi + Li_2S_2$         | - 5.03                                              | 2.52   | √    |
| R <sub>3</sub> |                                                     | $PhS_2Li + 2Li \rightarrow PhSLi + Li_2S$           | - 4.36                                              | 2.18   | √    |
| R <sub>3</sub> |                                                     | $Li_2S_2 + 2Li \rightarrow 2Li_2S$                  | - 3.80                                              | 1.90   | √    |
| R <sub>1</sub> | PhS <sub>12</sub> Ph                                | $PhS_{12}Ph + 2Li \rightarrow PhS_2Li + PhS_{10}Li$ | - 5.31                                              | 2.66   | √    |
| R <sub>2</sub> |                                                     | $PhS_{10}Li + 2Li \rightarrow PhS_8Li + Li_2S_2$    | - 5.07                                              | 2.54   | √    |
| R <sub>2</sub> |                                                     | $PhS_8Li + 2Li \rightarrow PhS_6Li + Li_2S_2$       | - 5.04                                              | 2.52   | √    |
| R <sub>2</sub> |                                                     | $PhS_6Li + 2Li \rightarrow PhS_4Li + Li_2S_2$       | - 4.92                                              | 2.46   | √    |
| R <sub>2</sub> |                                                     | $PhS_4Li + 2Li \rightarrow PhS_2Li + Li_2S_2$       | - 4.94                                              | 2.47   | √    |
| R <sub>3</sub> |                                                     | $PhS_2Li + 2Li \rightarrow PhSLi + Li_2S$           | - 4.36                                              | 2.18   | √    |
| R <sub>3</sub> |                                                     | $Li_2S_2 + 2Li \rightarrow 2Li_2S$                  | - 3.80                                              | 1.90   | √    |
| R <sub>1</sub> | PhS <sub>13</sub> Ph                                | $PhS_{13}Ph + 2Li \rightarrow PhS_2Li + PhS_{11}Li$ | - 4.99                                              | 2.50   | √    |
| R <sub>2</sub> |                                                     | $PhS_{11}Li + 2Li \rightarrow PhS_9Li + Li_2S_2$    | - 4.83                                              | 2.42   | √    |
| R <sub>2</sub> |                                                     | $PhS_9Li + 2Li \rightarrow PhS_7Li + Li_2S_2$       | - 5.49                                              | 2.75   | √    |
| R <sub>2</sub> |                                                     | $PhS_7Li + 2Li \rightarrow PhS_5Li + Li_2S_2$       | - 4.83                                              | 2.42   | √    |
| R <sub>2</sub> |                                                     | $PhS_5Li + 2Li \rightarrow PhS_3Li + Li_2S_2$       | - 5.01                                              | 2.51   | √    |
| R <sub>2</sub> |                                                     | $PhS_3Li + 2Li \rightarrow PhSLi + Li_2S_2$         | - 5.03                                              | 2.52   | √    |
| R <sub>3</sub> |                                                     | $PhS_2Li + 2Li \rightarrow PhSLi + Li_2S$           | - 4.36                                              | 2.18   | √    |
| R <sub>3</sub> |                                                     | $Li_2S_2 + 2Li \rightarrow 2Li_2S$                  | - 3.80                                              | 1.90   | √    |
| R <sub>1</sub> |                                                     | PhS <sub>14</sub> Ph                                | $PhS_{14}Ph + 2Li \rightarrow PhS_2Li + PhS_{12}Li$ | - 5.21 | 2.61 |
| R <sub>2</sub> | $PhS_{12}Li + 2Li \rightarrow PhS_{10}Li + Li_2S_2$ |                                                     | - 5.03                                              | 2.52   | √    |
| R <sub>2</sub> | $PhS_{10}Li + 2Li \rightarrow PhS_8Li + Li_2S_2$    |                                                     | - 5.07                                              | 2.54   | √    |
| R <sub>2</sub> | $PhS_8Li + 2Li \rightarrow PhS_6Li + Li_2S_2$       |                                                     | - 5.04                                              | 2.52   | √    |
| R <sub>2</sub> | $PhS_6Li + 2Li \rightarrow PhS_4Li + Li_2S_2$       |                                                     | - 4.92                                              | 2.46   | √    |
| R <sub>2</sub> | $PhS_4Li + 2Li \rightarrow PhS_2Li + Li_2S_2$       |                                                     | - 4.94                                              | 2.47   | √    |
| R <sub>3</sub> | $PhS_2Li + 2Li \rightarrow PhSLi + Li_2S$           |                                                     | - 4.36                                              | 2.18   | √    |
| R <sub>3</sub> | $Li_2S_2 + 2Li \rightarrow 2Li_2S$                  |                                                     | - 3.80                                              | 1.90   | √    |
| R <sub>1</sub> | PhS <sub>15</sub> Ph                                | $PhS_{15}Ph + 2Li \rightarrow PhS_2Li + PhS_{13}Li$ | - 5.23                                              | 2.62   | √    |
| R <sub>2</sub> |                                                     | $PhS_{13}Li + 2Li \rightarrow PhS_{11}Li + Li_2S_2$ | - 4.79                                              | 2.40   | √    |
| R <sub>2</sub> |                                                     | $PhS_{11}Li + 2Li \rightarrow PhS_9Li + Li_2S_2$    | - 4.83                                              | 2.42   | √    |
| R <sub>2</sub> |                                                     | $PhS_9Li + 2Li \rightarrow PhS_7Li + Li_2S_2$       | - 5.49                                              | 2.75   | √    |
| R <sub>2</sub> |                                                     | $PhS_7Li + 2Li \rightarrow PhS_5Li + Li_2S_2$       | - 4.83                                              | 2.42   | √    |
| R <sub>2</sub> |                                                     | $PhS_5Li + 2Li \rightarrow PhS_3Li + Li_2S_2$       | - 5.01                                              | 2.51   | √    |
| R <sub>2</sub> |                                                     | $PhS_3Li + 2Li \rightarrow PhSLi + Li_2S_2$         | - 5.03                                              | 2.52   | √    |
| R <sub>3</sub> |                                                     | $PhS_2Li + 2Li \rightarrow PhSLi + Li_2S$           | - 4.36                                              | 2.18   | √    |
| R <sub>3</sub> |                                                     | $Li_2S_2 + 2Li \rightarrow 2Li_2S$                  | - 3.80                                              | 1.90   | √    |
